# Supplementary material for: Comparison of Chemical and Electrochemical Approaches to Abacavir Oxidative Stability Testing
Source: MDPI journal article supplement (doi:10.3390/s23052776), 2023-03-03
Supplement: s1 [file s1]

## Supplementary Materials

L. Pražáková, J. Fischer, A. Taylor, A. Kubíčková: **Comparison of chemical and electrochemical approaches to abacavir oxidative stability testing**

**Table S1.** Summary table of abacavir oxidation products formed during degradation studies.

| Author         | Oxidation product | <i>m/z</i> | Expected formula       | Reference |
|----------------|-------------------|------------|------------------------|-----------|
| Vukkum et al.  | OX1               | 191.10     | -                      | [28]      |
|                | OX2               | 303.20     | $C_{14}H_{19}N_6O_2^+$ |           |
|                | OX3               | 223.20     | -                      |           |
|                | OX4               | 319.20     | $C_{14}H_{19}N_6O_3^+$ |           |
| Rao et al.     | OX2               | 303.20     | $C_{14}H_{19}N_6O_2^+$ | [29]      |
|                | OX5               | 247.19     | $C_{11}H_{15}N_6O^+$   |           |
| Kurmi et al.   | OX2               | 303.20     | $C_{14}H_{19}N_6O_2^+$ | [30]      |
|                | OX5               | 247.19     | $C_{11}H_{15}N_6O^+$   |           |
|                | OX6               | 321.17     | $C_{14}H_{21}N_6O_3^+$ |           |
|                | OX7               | 303.15     | $C_{14}H_{19}N_6O_2^+$ |           |
| Prakash et al. | OX4               | 319.22     | $C_{14}H_{19}N_6O_3^+$ | [31]      |
|                | OX5               | 247.19     | $C_{11}H_{15}N_6O^+$   |           |
| Zhou et al.    | OX5               | 246.90     | $C_{11}H_{15}N_6O^+$   | [18]      |
|                | OX4               | 319.20     | $C_{14}H_{19}N_6O_3^+$ |           |
|                | OX8               | 151.07     | $C_5H_7N_6^+$          |           |
